# Supplementary material
Source: publisher figshare collection journal article supplement (https://gsajournals.figshare.com/ndownloader/files/25764566)
Supplement: Supplementary file 1 [file 25764566]

## Sheet: Supplemental_Table_S6
Supplemental Table S6: NBS-LRR frequency per haplotype and per chromosome in Trayshed and Cabernet Sauvignon.
cv	hap	chr	CC-NBS	CC-NBS-LRR	CC-X	NBS	NBS-LRR	TIR-NBS	TIR-NBS-LRR	TIR-X	total
Cabernet Sauvignon	hap1	chr01	0	5	0	0	0	0	2	0	7
Cabernet Sauvignon	hap2	chr01	0	4	0	1	2	0	2	0	9
Trayshed	hap1	chr01	2	9	0	2	1	0	1	1	16
Trayshed	hap2	chr01	2	8	0	2	1	0	2	0	15
Cabernet Sauvignon	hap1	chr02	1	0	0	0	2	0	1	1	5
Cabernet Sauvignon	hap2	chr02	0	0	0	2	0	0	0	0	2
Trayshed	hap1	chr02	0	3	0	3	7	0	9	0	22
Trayshed	hap2	chr02	0	2	0	2	5	1	6	1	17
Cabernet Sauvignon	hap1	chr03	2	5	0	3	5	0	0	0	15
Cabernet Sauvignon	hap2	chr03	1	3	0	0	0	0	0	0	4
Trayshed	hap1	chr03	3	4	0	5	5	0	4	0	21
Trayshed	hap2	chr03	3	4	0	3	2	0	2	1	15
Cabernet Sauvignon	hap1	chr04	0	1	0	0	0	0	0	0	1
Cabernet Sauvignon	hap2	chr04	0	1	0	0	1	0	1	0	3
Trayshed	hap1	chr04	0	2	0	0	0	0	0	0	2
Trayshed	hap2	chr04	0	2	0	0	0	0	0	0	2
Cabernet Sauvignon	hap1	chr05	2	2	0	3	17	0	7	0	31
Cabernet Sauvignon	hap2	chr05	3	2	0	2	18	0	4	0	29
Trayshed	hap1	chr05	0	0	0	6	16	0	3	0	25
Trayshed	hap2	chr05	2	2	0	10	14	1	6	0	35
Cabernet Sauvignon	hap1	chr06	0	3	0	0	1	0	0	0	4
Cabernet Sauvignon	hap2	chr06	0	3	0	0	4	0	0	0	7
Trayshed	hap1	chr06	0	1	0	1	2	0	0	0	4
Trayshed	hap2	chr06	0	6	0	1	3	0	0	0	10
Cabernet Sauvignon	hap1	chr07	2	6	0	0	7	0	2	0	17
Cabernet Sauvignon	hap2	chr07	3	14	0	0	4	0	0	0	21
Trayshed	hap1	chr07	4	6	0	0	10	0	2	0	22
Trayshed	hap2	chr07	2	9	0	1	9	0	1	0	22
Cabernet Sauvignon	hap1	chr08	1	3	0	1	0	0	0	0	5
Trayshed	hap1	chr08	0	3	0	2	3	0	0	0	8
Trayshed	hap2	chr08	0	1	0	1	0	0	0	0	2
Cabernet Sauvignon	hap1	chr09	7	49	0	2	13	0	0	0	71
Cabernet Sauvignon	hap2	chr09	7	41	0	1	16	0	0	0	65
Trayshed	hap1	chr09	5	54	0	6	18	0	1	1	85
Trayshed	hap2	chr09	8	33	0	3	6	0	0	0	50
Cabernet Sauvignon	hap1	chr10	0	3	0	0	6	0	0	0	9
Cabernet Sauvignon	hap2	chr10	0	5	0	0	5	0	0	0	10
Trayshed	hap1	chr10	0	8	0	1	6	0	3	0	18
Trayshed	hap2	chr10	0	7	0	0	2	0	0	1	10
Cabernet Sauvignon	hap1	chr11	1	3	0	0	4	0	0	0	8
Cabernet Sauvignon	hap2	chr11	0	3	0	0	0	0	0	0	3
Trayshed	hap1	chr11	1	3	0	0	4	0	0	0	8
Trayshed	hap2	chr11	1	3	0	0	2	0	1	0	7
Cabernet Sauvignon	hap1	chr12	12	19	0	1	21	1	5	0	59
Cabernet Sauvignon	hap2	chr12	9	21	0	2	32	1	4	2	71
Trayshed	hap1	chr12	3	22	0	3	22	4	17	7	78
Trayshed	hap2	chr12	2	22	0	8	28	0	3	3	66
Cabernet Sauvignon	hap1	chr13	5	49	0	1	25	0	0	0	80
Cabernet Sauvignon	hap2	chr13	2	41	0	0	32	0	0	0	75
Trayshed	hap1	chr13	2	40	1	3	18	0	3	0	67
Trayshed	hap2	chr13	3	42	0	2	28	0	1	0	76
Cabernet Sauvignon	hap1	chr14	1	9	1	0	3	0	0	0	14
Cabernet Sauvignon	hap2	chr14	8	16	2	0	4	0	0	0	30
Trayshed	hap1	chr14	11	26	0	2	11	0	1	0	51
Trayshed	hap2	chr14	7	16	3	5	8	0	0	0	39
Cabernet Sauvignon	hap1	chr15	2	10	0	0	6	0	2	1	21
Cabernet Sauvignon	hap2	chr15	2	12	0	1	8	0	1	0	24
Trayshed	hap1	chr15	0	12	0	0	18	0	1	0	31
Trayshed	hap2	chr15	3	10	0	1	9	0	2	0	25
Cabernet Sauvignon	hap1	chr16	2	7	0	2	1	0	0	0	12
Cabernet Sauvignon	hap2	chr16	0	2	0	2	1	0	1	0	6
Trayshed	hap1	chr16	2	11	1	1	4	0	0	0	19
Trayshed	hap2	chr16	1	9	0	2	1	0	0	0	13
Cabernet Sauvignon	hap1	chr17	0	5	0	0	3	0	0	0	8
Cabernet Sauvignon	hap2	chr17	0	1	0	1	1	0	0	0	3
Trayshed	hap1	chr17	1	2	0	1	0	0	0	0	4
Trayshed	hap2	chr17	0	1	0	3	1	0	0	0	5
Cabernet Sauvignon	hap1	chr18	0	1	1	0	28	5	37	3	75
Cabernet Sauvignon	hap2	chr18	0	2	0	0	43	5	26	9	85
Trayshed	hap1	chr18	0	1	0	1	22	3	23	4	54
Trayshed	hap2	chr18	0	2	0	0	18	2	20	3	45
Cabernet Sauvignon	hap1	chr19	6	21	0	3	9	0	0	0	39
Cabernet Sauvignon	hap2	chr19	3	18	0	0	7	0	0	0	28
Trayshed	hap1	chr19	5	17	0	5	12	0	2	0	41
Trayshed	hap2	chr19	6	21	0	4	3	0	0	0	34
Trayshed	hap1	chr20	1	6	0	2	5	0	0	0	14
Trayshed	hap2	chr20	0	5	0	2	2	0	0	0	9
